# Supplementary material for: Solvation effect and binding of rhaponticin with iron: a spectroscopic and DFT/TDDFT study
Source: Royal Society of Chemistry journal article supplement (doi:10.1039/c8ra10153a), 2019-01-01
Supplement: c8ra10153a1.pdf [file c8ra10153a1.pdf]

Table S1. Binding parameters of interaction of RH with Fe<sup>3+</sup>.

| System                  | $K_{SV}$ ( $10^5 M^{-1}$ ) | R      | S.D. | $K$ ( $10^5 M^{-1}$ ) | $n$  | R      | S.D. |
|-------------------------|----------------------------|--------|------|-----------------------|------|--------|------|
| RH-Fe <sup>3+</sup> ion | 9.60                       | 0.9936 | 0.45 | 3.80                  | 1.17 | 0.9907 | 0.06 |
